# Supplementary material for: Combination of a bio-based polyphosphonate and modified graphene oxide toward superior flame retardant polylactic acid
Source: Royal Society of Chemistry journal article supplement (doi:10.1039/c7ra12224a), 2018-01-01
Supplement: c7ra12224a1.pdf [file c7ra12224a1.pdf]

## Combination of a bio-based polyphosphonate and modified graphene oxide toward superior flame retardant polylactic acid

Jian Jing,<sup>ab</sup> Yan Zhang,<sup>a\*</sup> Xinlei Tang,<sup>b</sup> Xiaonan Li<sup>a</sup>, Mao Peng<sup>b</sup> and Zhengping Fang<sup>ab</sup>

<sup>a</sup>Laboratory of Polymer Materials and Engineering, Ningbo Institute of Technology, Zhejiang University, Ningbo 315100, China

<sup>b</sup>MOE Key Laboratory of Macromolecular Synthesis and Functionalization, Institute of Polymer Composites, Zhejiang University, Hangzhou 310027, China

Corresponding author: Prof. Yan Zhang, zhangyan@nit.zju.edu.cn

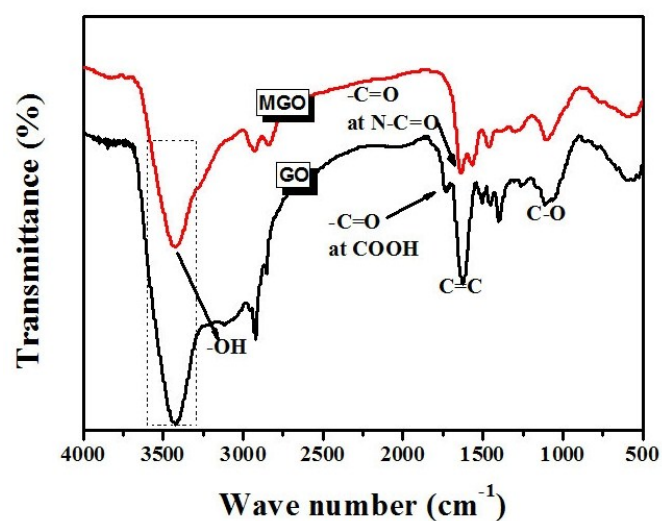

Fig. S1 FTIR spectra of GO and MGO

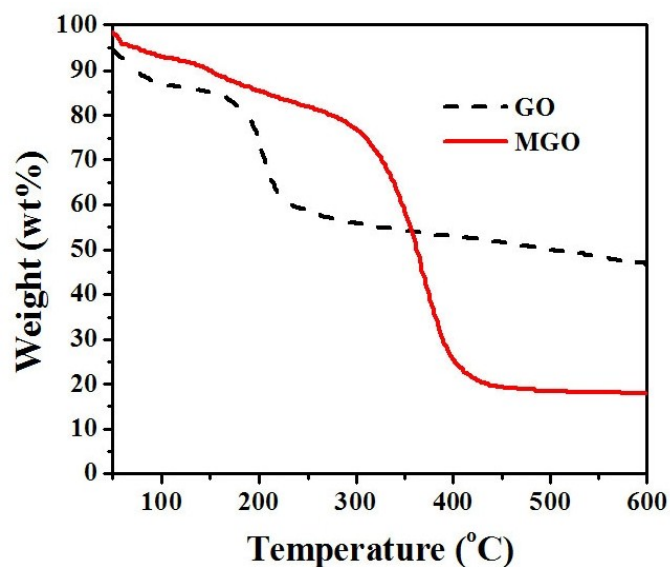

Fig. S2 TG curves of GO and MGO

Table S1 The impact strength of PLA and the flame retardant PLA

| Sample              | Impact strength<br>kJ·m <sup>-2</sup> |
|---------------------|---------------------------------------|
| PLA                 | 2.06±0.46                             |
| PLA/3BPPT           | 1.46±0.05                             |
| PLA/2.7BPPT/0.3M-GO | 1.60±0.07                             |
| PLA/2.4BPPT/0.6M-GO | 1.70±0.10                             |
| PLA/2.1BPPT/0.9M-GO | 1.67±0.09                             |
